# Supplementary material for: Simulation and estimation of gene number in a biological pathway using almost complete saturation mutagenesis screening of haploid mouse cells
Source: PubMed Central journal article supplement (PMC4301880; doi:10.1186/1471-2164-15-1016), 2014-11-24

**A**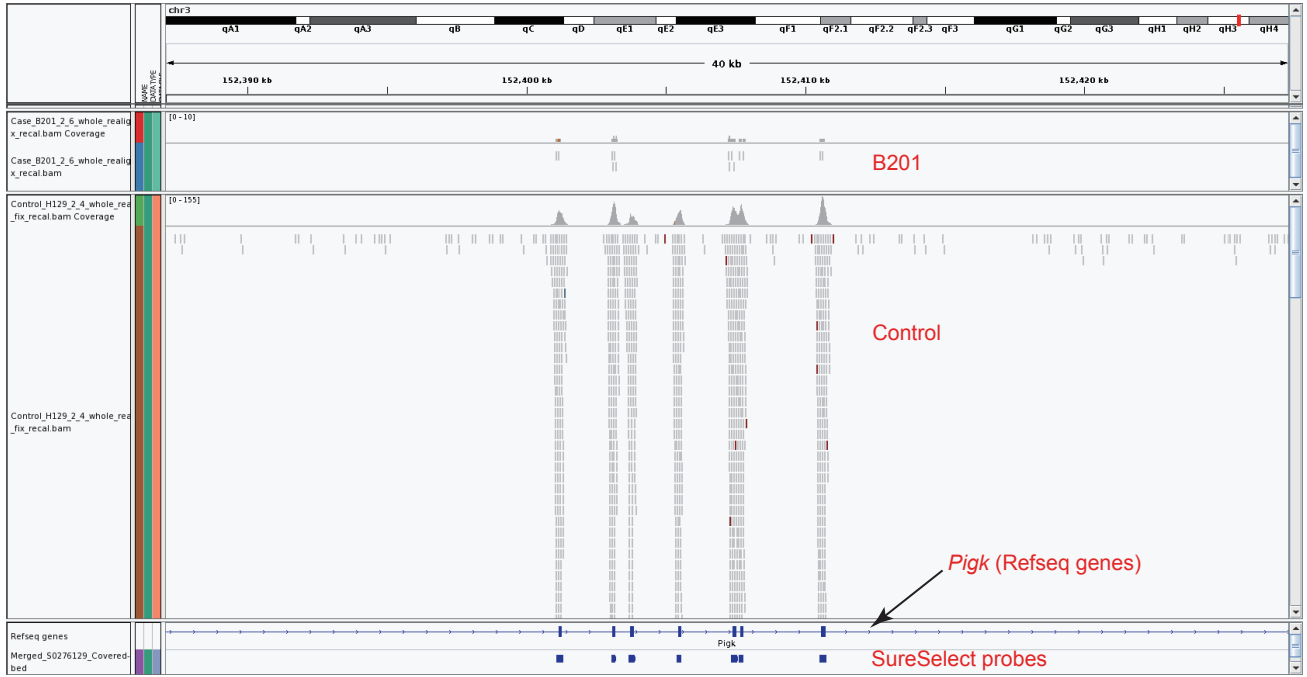**B**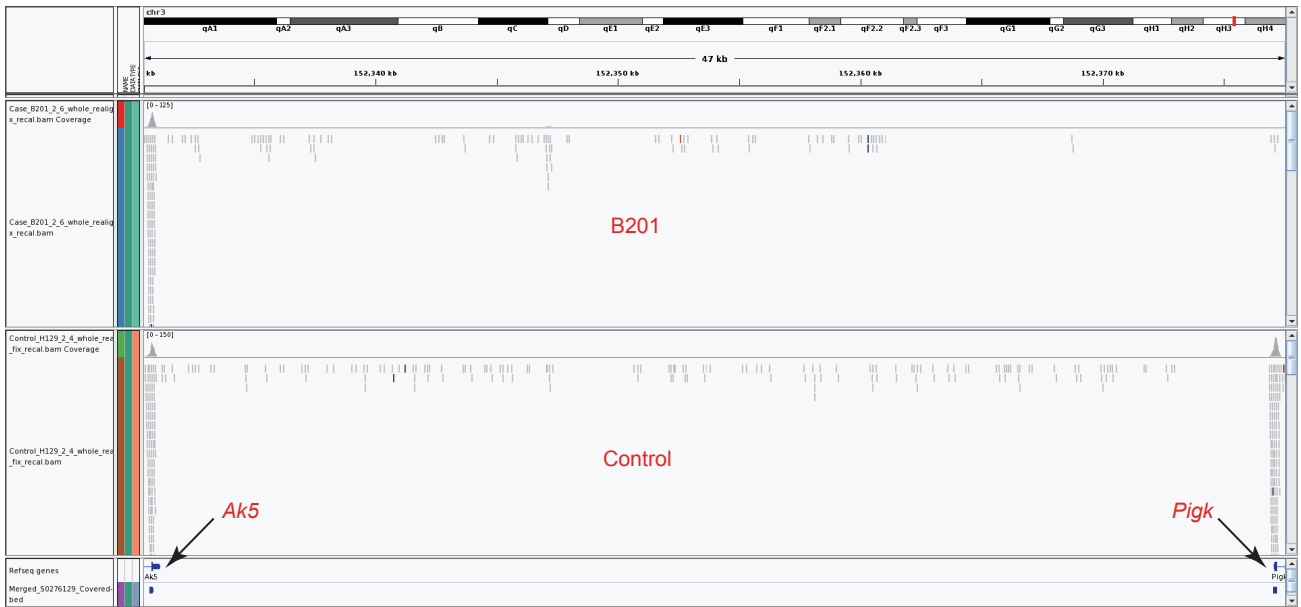

C

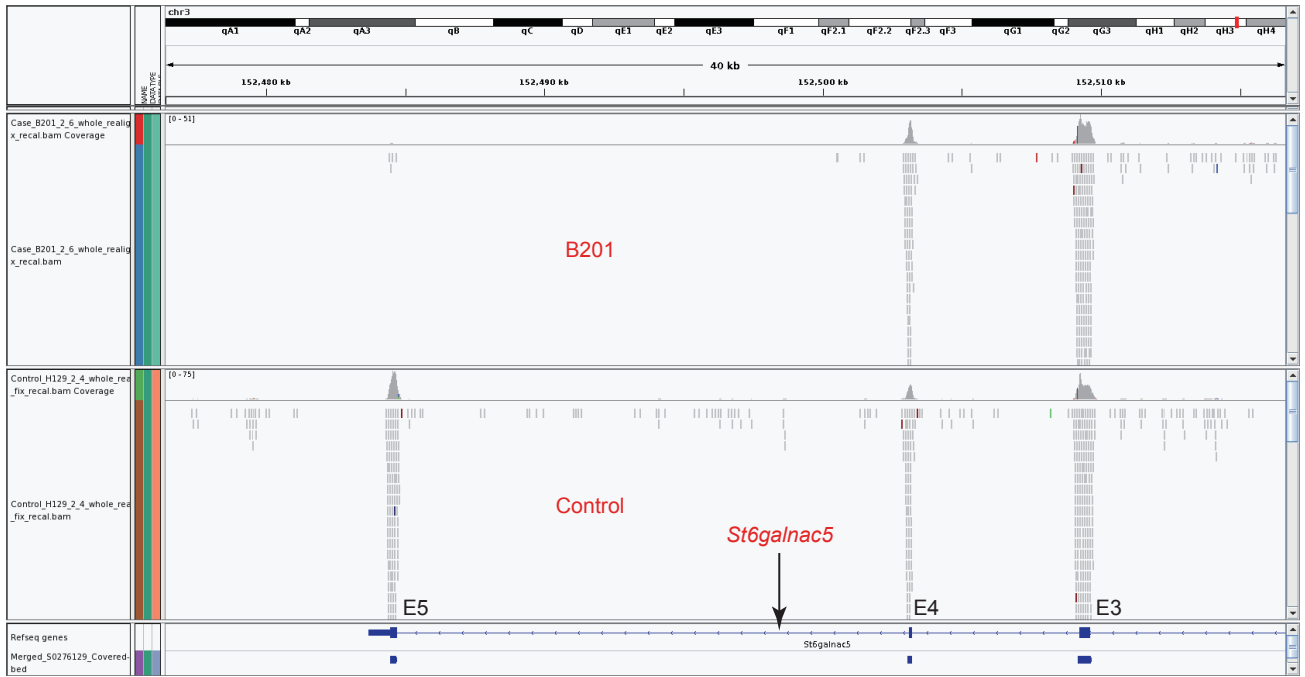

Supplement: 12864_2014_6837_MOESM5_ESM.pdf [file 12864_2014_6837_MOESM5_ESM.pdf]
